# Supplementary material for: Moving towards an organized cervical cancer screening: costs and impact
Source: PubMed Central journal article supplement — Eur J Public Health. 2018 Apr 18;28(6):1132–8. doi: 10.1093/eurpub/cky061 (PMC6241209; doi:10.1093/eurpub/cky061), 2018-04-18
Supplement: cky061_supplementary_appendix.pdf [file cky061_supplementary_appendix.pdf]

## SUPPLEMENTARY APPENDIX

### Accompanying the manuscript:

#### Moving towards an organised cervical cancer screening: costs and impact

**Mireia Diaz<sup>a,b</sup>, David Moraña<sup>a</sup>, Vanesa Rodríguez-Salés<sup>a</sup>, Raquel Ibañez<sup>a,b</sup>, Josep Alfons Espinás<sup>c,d</sup>, Silvia de Sanjosé<sup>e,f,g</sup>**

<sup>a</sup> Unit of Infections and Cancer (UNIC - I&I), Cancer Epidemiology Research Program (CERP), Institut Català d'Oncologia (ICO) - IDIBELL, L'Hospitalet de Llobregat, Barcelona, Spain

<sup>b</sup> CIBERONC, Barcelona, Spain

<sup>c</sup> Catalan Cancer Strategy, Department of Health, Generalitat de Catalunya, Barcelona, Spain

<sup>d</sup> Bellvitge Biomedical Research Institute– IDIBELL, University of Barcelona (UB), L'Hospitalet de Llobregat, Barcelona, Spain

<sup>e</sup> Cancer Epidemiology Research Program (CERP), Institut Català d'Oncologia (ICO) - IDIBELL, L'Hospitalet de Llobregat, Barcelona, Spain

<sup>f</sup> CIBERESP, Barcelona, Spain

<sup>g</sup> Path, Reproductive Health Programme

Corresponding authors:

Mireia Diaz ([mireia@iconcologia.net](mailto:mireia@iconcologia.net)) & David Moraña ([dmorina@iconcologia.net](mailto:dmorina@iconcologia.net))

For additional information on the model calibration, and epidemiological and cost data, see Georgalis et al 2016<sup>1</sup> and Moríña et al 2017<sup>2</sup>.

Table S1. High risk HPV (HR-HPV) prevalence in Catalonia based on data from the CLEOPATRE study<sup>3</sup>.

| Age group    | HR-HPV prevalence (Spain)* | HR-HPV prevalence (Catalonia) <sup>3</sup> | Calibrated HR-HPV prevalence |
|--------------|----------------------------|--------------------------------------------|------------------------------|
| <b>11-14</b> | -                          | -                                          | 0.0459                       |
| <b>15-19</b> | 0.2229                     | 0.3235                                     | 0.3015                       |
| <b>20-24</b> | 0.2307                     | 0.3689                                     | 0.3690                       |
| <b>25-29</b> | 0.1783                     | 0.1471                                     | 0.1358                       |
| <b>30-34</b> | 0.1250                     | 0.2609                                     | 0.2184                       |
| <b>35-39</b> | 0.0764                     | 0.1000                                     | 0.1409                       |
| <b>40-44</b> | 0.0671                     | 0.0400                                     | 0.0662                       |
| <b>45-49</b> | 0.0519                     | 0.0526                                     | 0.0516                       |
| <b>50-54</b> | 0.0663                     | 0.0732                                     | 0.0681                       |
| <b>55-59</b> | 0.0471                     | 0.0769                                     | 0.0508                       |
| <b>60-64</b> | 0.0348                     | -                                          | 0.0339                       |
| <b>65-69</b> | -                          | -                                          | 0.0312                       |
| <b>70-74</b> | -                          | -                                          | 0.0221                       |
| <b>75-79</b> | -                          | -                                          | 0.0140                       |
| <b>80-84</b> | -                          | -                                          | 0.0074                       |

Figure S1. High risk HPV (HR-HPV) prevalence in Catalonia based on data from the CLEOPATRE study<sup>1</sup>.

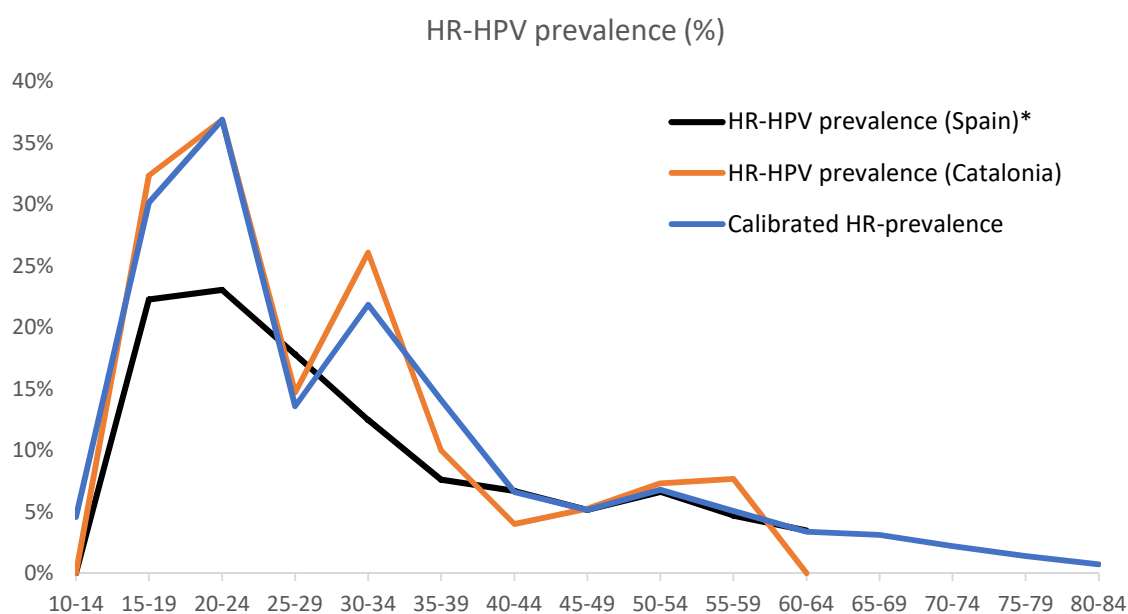

\* Initial values for Nelder-Mead calibration<sup>1</sup>

Table S2. Cervical cancer incidence rates per 100,000 woman-years before any intervention in Catalonia based on data from the Cancer Incidence in Five Continents report and applying the correction factor described by Peto et al.<sup>1,4,5</sup>.

| Age group | Cervical cancer incidence (Spain)* | Cervical cancer incidence (Catalonia) <sup>1,4,5</sup> | Calibrated cervical cancer incidence |
|-----------|------------------------------------|--------------------------------------------------------|--------------------------------------|
| 10-14     | 0.0000                             | 0.0000                                                 | 0.0000                               |
| 15-19     | 0.0000                             | 0.0000                                                 | 0.0000                               |
| 20-24     | 0.0000                             | 0.4427                                                 | 0.0000                               |
| 25-29     | 3.1280                             | 3.3793                                                 | 3.6892                               |
| 30-34     | 10.4000                            | 5.7153                                                 | 6.2327                               |
| 35-39     | 23.8760                            | 12.3704                                                | 10.7475                              |
| 40-44     | 33.0840                            | 12.4870                                                | 13.1929                              |
| 45-49     | 38.5680                            | 14.5096                                                | 14.2280                              |
| 50-54     | 35.1600                            | 17.3822                                                | 16.9602                              |
| 55-59     | 31.9800                            | 27.5696                                                | 27.4427                              |
| 60-64     | 25.8240                            | 21.0001                                                | 19.8791                              |
| 65-69     | 18.3960                            | 21.2341                                                | 18.6855                              |
| 70-74     | 25.3040                            | 17.8969                                                | 15.4388                              |
| 75-79     | 18.1780                            | 16.0337                                                | 14.8822                              |
| 80-84     | 13.3440                            | 20.0293                                                | 22.5735                              |
| 85+       | -                                  | 4.1573                                                 | -                                    |

Figure S2. Cervical cancer incidence rates before any intervention in Catalonia based on data from the Cancer Incidence in Five Continents report and applying the correction factor described by Peto et al.<sup>1,4,5</sup>

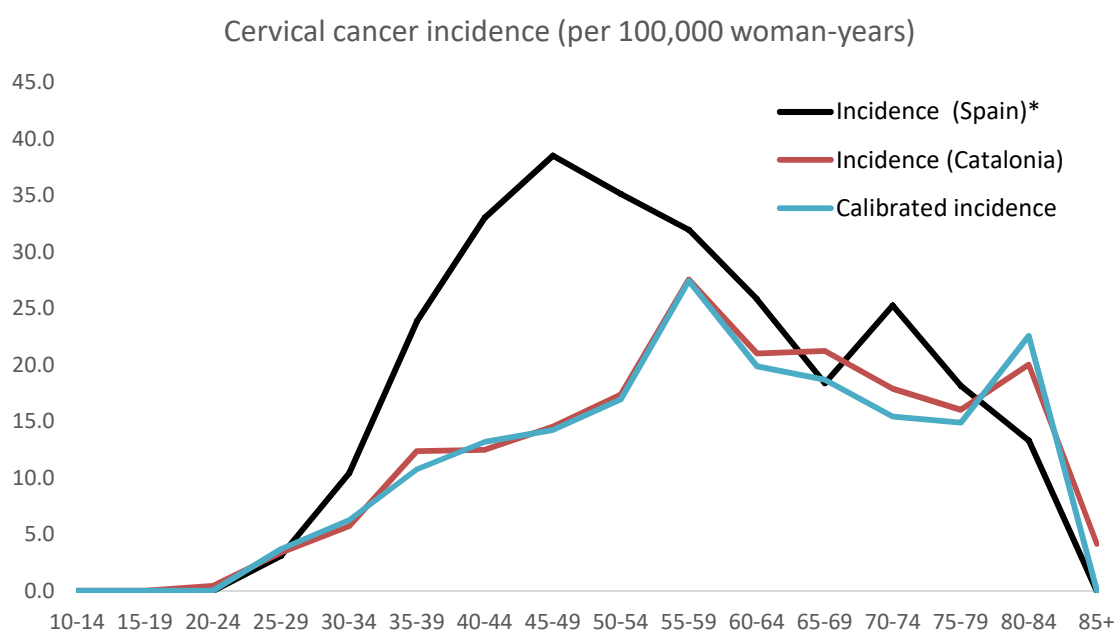

\* Initial values for Nelder-Mead calibration<sup>1</sup>

Table S3. Comparison of model predictions and observed data for Catalonia.

| <b>Outcomes</b>                                                        | <b>Observed data in Catalonia</b> | <b>Model predictions*</b> |
|------------------------------------------------------------------------|-----------------------------------|---------------------------|
| Annual number of cytologies (women aged 25-64), 2008-2015 <sup>6</sup> | 137,968-163,389                   | 144,043                   |
| Crude annual incidence rate, 2003-2007 <sup>4</sup>                    | 10.7                              | 10.1                      |
| Crude annual mortality rate, 2003-2008 <sup>7</sup>                    | 2.6                               | 2.5                       |

\* Current opportunistic screening with 3y-cytology

Table S4. Summary of unit costs introduced in the cervical cancer simulation model for Catalonia indexed to 2017.

| Component                           | Description                                                                                                                                                                                                                                              | DMC        | DNMC    | TOTAL      |
|-------------------------------------|----------------------------------------------------------------------------------------------------------------------------------------------------------------------------------------------------------------------------------------------------------|------------|---------|------------|
| SCREENING                           |                                                                                                                                                                                                                                                          |            |         |            |
| Cytology                            | Cost of cytology/HPV collection kit, staff, disposable supplies, laboratory transport, equipment, other supplies, facilities, patient transport and patient time                                                                                         | € 57.4     | € 17.9  | € 75.3     |
| HPV DNA test                        |                                                                                                                                                                                                                                                          | € 64.6     | € 17.9  | € 82.5     |
| FOLLOW-UP AND TREATMENT             |                                                                                                                                                                                                                                                          |            |         |            |
| CIN 1                               |                                                                                                                                                                                                                                                          | € 251.0    | € 80.4  | € 331.3    |
| CIN 2                               |                                                                                                                                                                                                                                                          | € 1,477.2  | € 191.7 | € 1,669.0  |
| CIN 3                               | Follow-up visits and complementary procedures (cytologies, HPV testing, colposcopies, biopsies), treatment and hospitalisation for CIN 2-3+, treatment-specific staff time, supplies, equipment, patient time to receive services, and patient transport | € 1,477.2  | € 191.7 | € 1,669.0  |
| Invasive cervical cancer, stage I   |                                                                                                                                                                                                                                                          | € 5,477.2  | € 216.4 | € 5,693.9  |
| Invasive cervical cancer, stage II  |                                                                                                                                                                                                                                                          | € 12,271.3 | € 216.4 | € 12,487.6 |
| Invasive cervical cancer, stage III |                                                                                                                                                                                                                                                          | € 22,834.7 | € 216.4 | € 23,051.1 |
| Invasive cervical cancer, stage IV  |                                                                                                                                                                                                                                                          | € 33,591.9 | € 216.4 | € 33,808.3 |
| VACCINATION                         |                                                                                                                                                                                                                                                          |            |         |            |
| Cost per dose (3 doses)             | Vaccination cost per dose and administration costs                                                                                                                                                                                                       | €4.40      |         | €102.9€    |

DMC: direct medical cost; DNMC: direct non-medical cost

Table S5. Estimated annual **undiscounted** costs of the current opportunistic cytology screening vs an organised programme based on primary HPV screening at different coverage rates (€ 2017)

| Cost category           | Opportunistic screening<br>with 3y-cytology |                     | Organised screening<br>with 5y-HPV testing and cytology triage |                     |                     |
|-------------------------|---------------------------------------------|---------------------|----------------------------------------------------------------|---------------------|---------------------|
|                         | 40%                                         | 70%                 | 40%                                                            | 70%                 | 100%                |
| Total direct cost       | € 28,050,016                                | € 43,137,236        | € 18,666,460                                                   | € 26,805,323        | € 35,103,879        |
| Direct medical cost     | € 23,044,544                                | € 34,493,831        | € 16,038,665                                                   | € 22,301,404        | € 28,742,250        |
| Direct non-medical cost | € 5,005,471                                 | € 8,643,405         | € 2,627,795                                                    | € 4,503,919         | € 2,856,429         |
| Programmatic cost       | € 0                                         | € 0                 | € 1,140,566                                                    | € 1,997,743         | € 14,282,144        |
| Indirect cost           | € 9,679,273                                 | € 8,163,734         | € 9,807,769                                                    | € 8,195,959         | € 6,868,317         |
| <b>TOTAL COST</b>       | <b>€ 37,729,288</b>                         | <b>€ 51,300,971</b> | <b>€ 29,614,795</b>                                            | <b>€ 36,999,025</b> | <b>€ 52,749,140</b> |

Table S6. Estimated annual **undiscounted** costs per adult woman of the current opportunistic cytology screening vs an organised programme based on primary HPV screening at different coverage rates (€ 2017)

| Cost category           | Opportunistic screening<br>with 3y-cytology |               | Organised screening<br>with 5y-HPV testing and cytology triage |               |               |
|-------------------------|---------------------------------------------|---------------|----------------------------------------------------------------|---------------|---------------|
|                         | 40%                                         | 70%           | 40%                                                            | 70%           | 100%          |
| Total direct cost       | € 8.6                                       | € 13.3        | € 5.7                                                          | € 8.2         | € 10.8        |
| Direct medical cost     | € 7.1                                       | € 10.6        | € 4.9                                                          | € 6.9         | € 8.8         |
| Direct non-medical cost | € 1.5                                       | € 2.7         | € 0.8                                                          | € 1.4         | € 2.0         |
| Programmatic cost       | € 0.0                                       | € 0.0         | € 1.8                                                          | € 3.1         | € 4.4         |
| Indirect cost           | € 3.0                                       | € 2.5         | € 3.0                                                          | € 2.5         | € 2.1         |
| <b>TOTAL COST</b>       | <b>€ 11.6</b>                               | <b>€ 15.8</b> | <b>€ 10.5</b>                                                  | <b>€ 13.8</b> | <b>€ 17.3</b> |

Table S7. Estimated annual **undiscounted** costs per screened woman aged 25 to 64 of the current opportunistic cytology screening vs an organised programme based on primary HPV screening at different coverage rates (€ 2017)

| Cost category           | Opportunistic screening<br>with 3y-cytology |               | Organised screening<br>with 5y-HPV testing and cytology triage |               |               |
|-------------------------|---------------------------------------------|---------------|----------------------------------------------------------------|---------------|---------------|
|                         | 40%                                         | 70%           | 40%                                                            | 70%           | 100%          |
| Total direct cost       | € 40.4                                      | € 35.5        | € 26.9                                                         | € 22.1        | € 20.2        |
| Direct medical cost     | € 33.2                                      | € 28.4        | € 23.1                                                         | € 18.4        | € 16.6        |
| Direct non-medical cost | € 7.2                                       | € 7.1         | € 3.8                                                          | € 3.7         | € 3.7         |
| Programmatic cost       | € 0.0                                       | € 0.0         | € 4.4                                                          | € 4.4         | € 4.4         |
| Indirect cost           | € 7.4                                       | 3.6           | € 7.5                                                          | € 3.6         | € 2.1         |
| <b>TOTAL COST</b>       | <b>€ 47.8</b>                               | <b>€ 39.1</b> | <b>€ 38.8</b>                                                  | <b>€ 30.0</b> | <b>€ 26.7</b> |

Table S8. Estimated annual **discounted** costs of the current opportunistic cytology screening vs an organised programme based on primary HPV screening at different coverage rates (€ 2017)

| Cost category           | Opportunistic screening<br>with 3y-cytology |                     | Organised screening<br>with 5y-HPV testing and cytology triage |                     |                     |
|-------------------------|---------------------------------------------|---------------------|----------------------------------------------------------------|---------------------|---------------------|
|                         | 40%                                         | 70%                 | 40%                                                            | 70%                 | 100%                |
| Total direct cost       | € 9,911,396                                 | € 15,819,725        | € 6,478,753                                                    | € 9,859,336         | € 13,282,524        |
| Direct medical cost     | € 8,017,296                                 | € 12,540,614        | € 5,443,275                                                    | € 8,073,315         | € 10,752,081        |
| Direct non-medical cost | € 1,894,100                                 | € 3,279,110         | € 1,035,478                                                    | € 1,786,022         | € 2,530,443         |
| Programmatic cost       | 0                                           | 0                   | € 388,106                                                      | € 679,724           | € 971,850           |
| Indirect cost           | € 3,420,144                                 | € 2,993,888         | € 3,404,079                                                    | € 3,014,577         | € 2,598,818         |
| <b>TOTAL COST</b>       | <b>€ 13,331,540</b>                         | <b>€ 18,813,612</b> | <b>€ 10,270,938</b>                                            | <b>€ 13,553,638</b> | <b>€ 16,853,191</b> |

Table S9. Estimated annual **discounted** costs per adult woman of the current opportunistic cytology screening vs an organised programme based on primary HPV screening at different coverage rates (€ 2017)

| Cost category           | Opportunistic screening<br>with 3y-cytology |              | Organised screening<br>with 5y-HPV testing and cytology triage |              |              |
|-------------------------|---------------------------------------------|--------------|----------------------------------------------------------------|--------------|--------------|
|                         | 40%                                         | 70%          | 40%                                                            | 70%          | 100%         |
| Total direct cost       | € 3.0                                       | € 4.9        | € 2.0                                                          | € 3.0        | € 4.1        |
| Direct medical cost     | € 2.5                                       | € 3.9        | € 1.7                                                          | € 2.5        | € 3.3        |
| Direct non-medical cost | € 0.6                                       | € 1.0        | € 0.3                                                          | € 0.5        | € 0.8        |
| Programmatic cost       | € 0.0                                       | € 0.0        | € 0.6                                                          | € 1.0        | € 1.5        |
| Indirect cost           | € 1.1                                       | € 0.9        | € 1.0                                                          | € 0.9        | € 0.8        |
| <b>TOTAL COST</b>       | <b>€ 4.1</b>                                | <b>€ 5.8</b> | <b>€ 3.6</b>                                                   | <b>€ 5.0</b> | <b>€ 6.4</b> |

Table S10. Estimated annual **discounted** costs per screened woman aged 25 to 64 of the current opportunistic cytology screening vs an organised programme based on primary HPV screening at different coverage rates (€ 2017)

| Cost category           | Opportunistic screening<br>with 3y-cytology |               | Organised screening<br>with 5y-HPV testing and cytology triage |               |              |
|-------------------------|---------------------------------------------|---------------|----------------------------------------------------------------|---------------|--------------|
|                         | 40%                                         | 70%           | 40%                                                            | 70%           | 100%         |
| Total direct cost       | € 14.3                                      | € 13.0        | € 9.3                                                          | € 8.1         | € 7.7        |
| Direct medical cost     | € 11.5                                      | € 10.3        | € 7.8                                                          | € 6.6         | € 6.2        |
| Direct non-medical cost | € 2.7                                       | € 2.7         | € 1.5                                                          | € 1.5         | € 1.5        |
| Programmatic cost       | € 0.0                                       | € 0.0         | € 1.5                                                          | € 1.5         | € 1.5        |
| Indirect cost           | € 2.6                                       | € 1.3         | € 2.6                                                          | € 1.3         | € 0.8        |
| <b>TOTAL COST</b>       | <b>€ 16.9</b>                               | <b>€ 14.3</b> | <b>€ 13.4</b>                                                  | <b>€ 10.9</b> | <b>€ 9.9</b> |

1. Georgalis L, de Sanjosé S, Esnaola M, Bosch FX, Diaz M. Present and future of cervical cancer prevention in Spain: a cost-effectiveness analysis. *Eur J Cancer Prev Off J Eur Cancer Prev Organ ECP*. 2016;25(5)(September):430–9.
2. Moriña D, de Sanjosé S, Diaz M. Impact of model calibration on cost-effectiveness analysis of cervical cancer prevention. *Sci Rep [Internet]*. 2017 Dec 8 [cited 2018 Jan 11];7. Available from: <https://www.ncbi.nlm.nih.gov/pmc/articles/PMC5722890/>
3. Castellsagué X, Iftner T, Roura E, Vidart JA, Kjaer SK, Bosch FX, et al. Prevalence and genotype distribution of human papillomavirus infection of the cervix in Spain: the CLEOPATRE study. *J Med Virol*. 2012 Jun;84(6):947–56.
4. Forman D, Bray F, Brewster D, Gombe Mbalawa C, Kohler B, Piñeros M, et al. Cancer Incidence in Five Continents, Vol. X (electronic version) Lyon, IARC. [Internet]. [cited 2014 Mar 6]. Available from: <http://ci5.iarc.fr>
5. Peto J, Gilham C, Fletcher O, Matthews FE. The cervical cancer epidemic that screening has prevented in the UK. *Lancet*. 2004 Jul 17;364(9430):249–56.
6. Programa de detecció precoç de càncer de coll d'úter [Internet]. Càncer. [cited 2017 Jul 18]. Available from: [http://cancer.gencat.cat/ca/professionals/deteccio\\_precoc/cancer\\_de\\_coll\\_d\\_uter/](http://cancer.gencat.cat/ca/professionals/deteccio_precoc/cancer_de_coll_d_uter/)
7. El càncer a Catalunya - Monografia 2016 [Internet]. Pla director d'Oncologia, Generalitat de Catalunya. [cited 2017 May 30]. Available from: <http://cancer.gencat.cat/ca/professionals/estadistiques/>
